# Supplementary material for: Changes in Gab2 phosphorylation and interaction partners in response to interleukin (IL)-2 stimulation in T-lymphocytes
Source: PubMed Central journal article supplement (PMC4812247; doi:10.1038/srep23530), 2016-03-30
Supplement: srep23530-s1.pdf [file srep23530-s1.pdf]

# **Supplementary Information**

## **Changes in Gab2 phosphorylation and interaction partners in response to interleukin (IL)-2 stimulation in T-lymphocytes**

Nerea Osinalde, Virginia Sánchez-Quiles, Blagoy Blagoev & Irina Kratchmarova\*

Department of Biochemistry and Molecular Biology, University of Southern Denmark, 5230 Odense M, Denmark.



## Osinalde\_Supplementary Figure S2

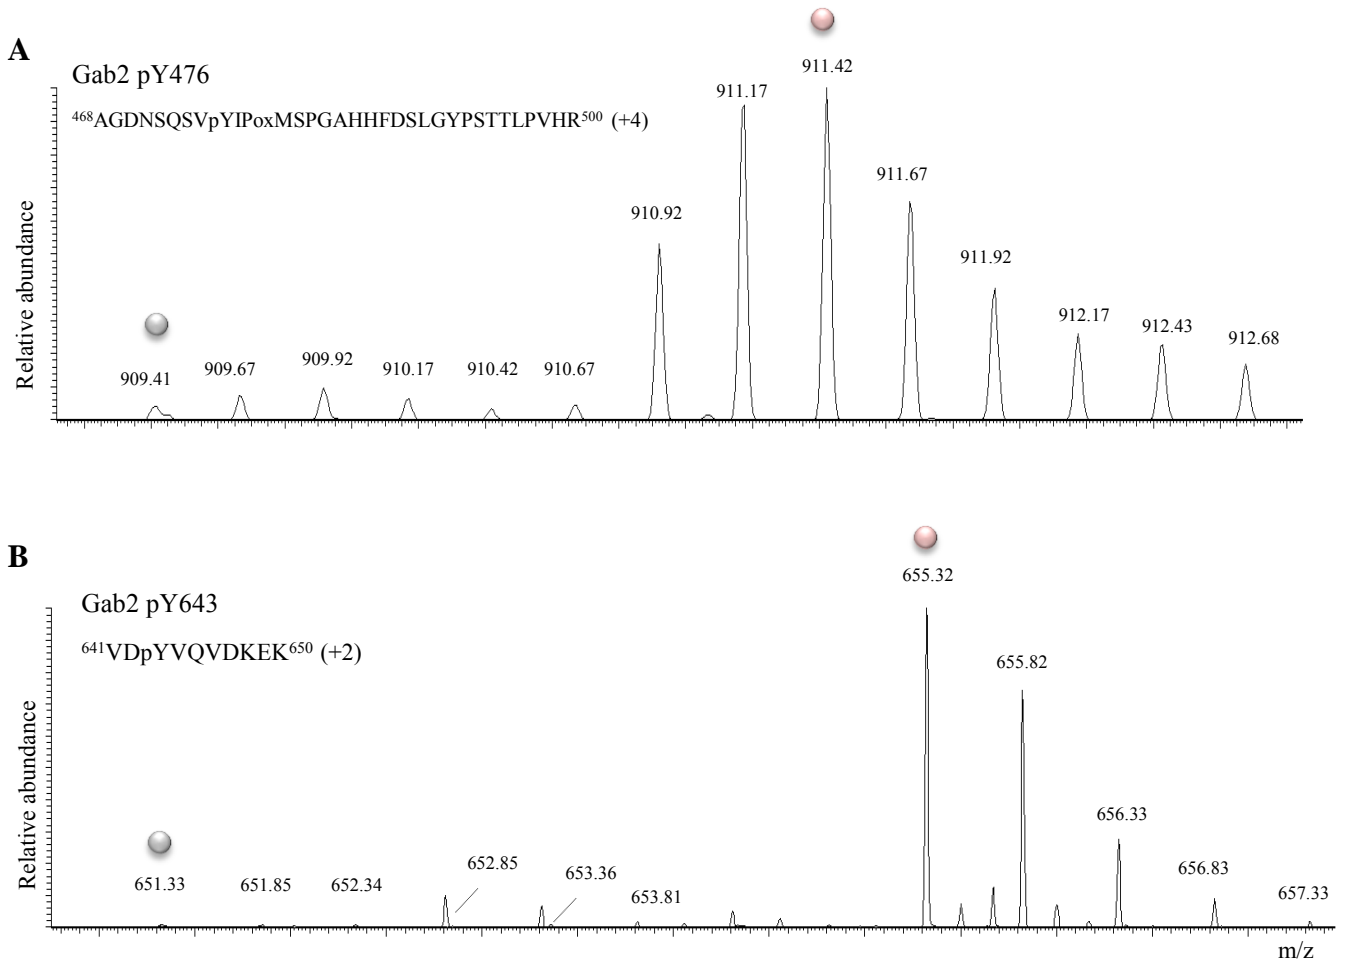

**Supplementary Figure S2. MS spectra of pY-bearing peptides induced upon IL-2 stimulation.** MS spectra of (A) pY468 and (B) pY643- containing phosphopeptides shows that both phosphopeptides are more abundant in IL-2-treated condition (heavy SILAC condition, pink dot) in comparison to control condition (light SILAC condition, grey dot). Therefore, results indicate that GAB2 Y468 and Y643 become phosphorylated in IL-2-treated Kit225 T-cells in vivo.

### Osinalde\_Supplementary Figure S3

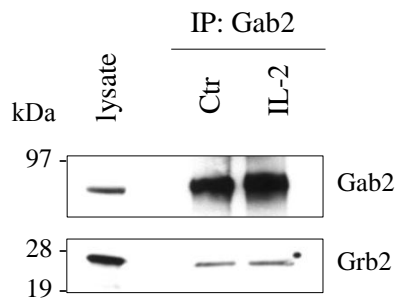

**Supplementary Figure S3. Gab2 constitutively associates with Grb2 in Kit225 T-cells.** Immunoprecipitation of Gab2 followed by immunoblotting detection confirmed our MS-based data indicating that Gab2 and Grb2 constitutively interact in Kit225 T-lymphocytes

**Supplementary Table S1. List of primers used in real time PCR analyses for mRNA expression**

| Gene           | Forward primer (5'-3') Sequence | Reverse primer (5'-3') Sequence |
|----------------|---------------------------------|---------------------------------|
| Gab1           | AAGACTACCTGTTGCTCATCAACTGT      | GGACGTTATCATTGGAGTCTGTTTC       |
| Gab2           | GCCGGCACAATACAGAATTCA           | GTGAGGCTGCCCTTGGTGT             |
| Gab3           | CACTGCAGCCCTGATGACTA            | GAGAAAGCTGGTTCGACTG             |
| $\beta$ -actin | GACAGCAGTCGGTTGGAGCG            | ACCTCCCCTGTGTGGACTTGG           |
